1 **The anthropometric and physical qualities of women's rugby league Super League and**  
2 **international players; identifying differences in playing position and standard**

3

4 *Short title: The anthropometric and physical qualities of elite women's rugby league players*

5

6 Sean Scantlebury<sup>1,2</sup>, Sam McCormack<sup>1,2</sup>, Thomas Sawczuk<sup>1,2,4</sup>, Stacey Emmonds<sup>1,2</sup>, Neil

7 Collins<sup>1,2</sup>, Jake Beech, Carlos Ramirez<sup>1,2</sup>, Cameron Owen<sup>1,7</sup>, Ben Jones<sup>1,2,3,5,6</sup>

8

9 <sup>1</sup> Carnegie Applied Rugby Research (CARR) Centre, Carnegie School of Sport, Leeds

10 Beckett University, Leeds, United Kingdom

11 <sup>2</sup> England Performance Unit, Rugby Football League Ltd, Leeds, United Kingdom

12 <sup>3</sup> Leeds Rhinos Rugby League Club, Leeds, United Kingdom

13 <sup>4</sup> School of Built Environment, Engineering and Computing, Leeds Beckett University,

14 Leeds, United Kingdom

15 <sup>5</sup> Division of Exercise Science and Sports Medicine, University of Cape Town, Faculty of

16 Health Sciences, Cape Town, South Africa

17 <sup>6</sup> School of Science and Technology, University of New England, Armidale, NSW, Australia

18 <sup>7</sup> Leeds Rhinos Netball, Leeds, United Kingdom

19

20 **Address for correspondence**

21 Dr Sean Scantlebury,

22 Carnegie Applied Rugby Research (CARR) centre, Headingley Campus, Leeds Beckett

23 University, West Yorkshire, LS6 3QS

24 *Email: [s.scantlebury@leedsbeckett.ac.uk](mailto:s.scantlebury@leedsbeckett.ac.uk)*

25 **Abstract**

26 Participation in women's rugby league has been growing since the foundation of the English women's  
27 rugby league Super League in 2017. However, the evidence base to inform women's rugby league  
28 remains sparse. This study provides the largest quantification of anthropometric and physical qualities  
29 of women's rugby league players to date, identifying differences between positions (forwards & backs)  
30 and playing standard (Women's Super League [WSL] vs. International). The height, weight, body  
31 composition, lower body strength, jump height, speed and aerobic capacity of 207 players were  
32 quantified during the pre-season period. Linear mixed models and effects sizes were used to determine  
33 differences between positions and standards. Forwards were significantly ( $p < 0.05$ ) heavier (forwards:  
34  $82.5 \pm 14.8\text{kg}$ ; backs:  $67.7 \pm 9.2\text{kg}$ ) and have a greater body fat % (forwards:  $37.7 \pm 6.9\%$ ; backs:  $30.4$   
35  $\pm 6.3\%$ ) than backs. Backs had significantly greater lower body power measured via jump height  
36 (forwards:  $23.5 \pm 4.4\text{cm}$ ; backs:  $27.6 \pm 4.9\text{cm}$ ), speed over 10m (forwards:  $2.12 \pm 0.14\text{s}$ ; backs:  $1.98 \pm$   
37  $0.11\text{s}$ ), 20m (forwards:  $3.71 \pm 0.27\text{s}$ ; backs:  $3.46 \pm 0.20\text{s}$ ), 30m (forwards:  $5.29 \pm 0.41\text{s}$ ; backs:  $4.90 \pm$   
38  $0.33\text{s}$ ), 40m (forwards:  $6.91 \pm 0.61\text{s}$ ; backs:  $6.33 \pm 0.46\text{s}$ ) and aerobic capacity (forwards:  $453.4 \pm$   
39  $258.8\text{m}$ ; backs:  $665.0 \pm 298.2\text{m}$ ) than forwards. Additionally, international players were found to have  
40 greater anthropometric and physical qualities in comparison to their WSL counterparts. This study adds  
41 to the limited evidence base surrounding the anthropometric and physical qualities of elite women's  
42 rugby league players. Comparative values for anthropometric and physical qualities are provided which  
43 practitioners may use to evaluate the strengths and weaknesses of players, informing training programs  
44 to prepare players for the demands of women's rugby league.

45 **Keywords:** anthropometric; physical; international; female; rugby league

47 **Introduction**

48 Participation in women's rugby league is increasing [1]. The number of Australian women playing  
49 rugby league in 2018 increased by 29%, whilst participation in the UK has increased linearly since 2015  
50 with a 35% growth in school programs from 2015 to 2019 [2]. However, despite continuous growth,  
51 research within women's rugby league is sparse, with a recent call to action [1] highlighting the need  
52 to increase the evidence base within the sport.

53

54 Rugby league is an intermittent collision sport comprised of intense activities (e.g. sprinting, tackling)  
55 interspersed with bouts of lower intensity activity (e.g. walking) [3]. Due to the demanding nature of  
56 rugby league, players require a range of well-developed anthropometric and physical qualities (e.g.  
57 speed, power, body composition) to meet game demands, optimise performance and reduce the  
58 likelihood of injury (Gabbett et al., 2012; Till et al., 2017). Therefore, the anthropometric and physical  
59 qualities of female rugby league players have received inceptive attention (Gabbett, 2007). Initial  
60 research found female Australian international backs to be quicker than forwards over 10 (backs:  $1.96$   
61  $\pm 0.10$ s; forwards:  $2.04 \pm 0.10$ s), 20 (backs:  $3.44 \pm 0.14$ s; forwards:  $3.60 \pm 0.19$ s) and 40 meters (backs:  
62  $6.33 \pm 0.25$ s; forwards:  $6.59 \pm 0.25$ s), have greater muscular power (backs:  $35.7 \pm 5.9$ cm; forwards:  
63  $35.1 \pm 8.0$ cm), agility (backs:  $2.64 \pm 0.19$ s; forwards:  $2.63 \pm 0.13$ s) and estimated maximal aerobic  
64 power (backs:  $32.2 \pm 4.4$ ml·kg<sup>-1</sup>·min<sup>-1</sup>; forwards:  $35.3 \pm 3.43$ ml·kg<sup>-1</sup>·min<sup>-1</sup>). On the other hand,  
65 forwards were heavier (forwards:  $75.5 \pm 12.5$ kg; backs:  $64.7 \pm 7.6$ kg) with a greater sum of seven  
66 skinfolds (forwards:  $141.2 \pm 37.2$ mm; backs:  $114.8 \pm 20.2$ mm) in comparison to backs (Gabbett, 2007).

67

68 More recently, Jones et al., (2016) found English international representative backs to be quicker than  
69 forwards over 10m (backs:  $1.87 \pm 0.09$ s; forwards:  $2.01 \pm 0.17$ s), 20m (backs:  $3.36 \pm 0.18$ s; forwards:  
70  $3.60 \pm 0.26$ s), 30m (backs:  $4.68 \pm 0.25$ s; forwards:  $5.05 \pm 0.44$ s) and 40m (backs:  $6.13 \pm 0.25$ s;  
71 forwards:  $6.59 \pm 0.61$ s). Furthermore, backs had greater agility turning off their right (backs:  $2.59 \pm$   
72  $0.11$ s; forwards:  $2.70 \pm 0.15$ s) and left foot (backs:  $2.58 \pm 0.14$ s; forwards:  $2.74 \pm 0.21$ s), and greater

73 power (measured via a countermovement jump; backs:  $0.29 \pm 0.05\text{m}$ ; forwards:  $0.24 \pm 0.05\text{m}$ ).  
74 Forwards had a greater body mass (backs:  $66.0 \pm 7.3\text{kg}$ ; forwards:  $80.7 \pm 14.3\text{kg}$ ) and percentage body  
75 fat (backs:  $27.7 \pm 4.8\%$ ; forwards:  $33.5 \pm 5.6\%$ ) compared to backs. These findings substantiate the  
76 earlier work of Gabbett (2007) who investigated Australian international women's rugby league  
77 players.

78

79 Whilst the previous work of Gabbett (2007) and Jones et al., (2016) provides an initial insight into the  
80 anthropometric and physical characteristics of elite women's rugby league players, sports such as rugby  
81 union and soccer have demonstrated an increase in physical qualities over time with players becoming  
82 stronger, faster and fitter, in line with the increased professionalism of the game [8,9]. Consequently,  
83 further research is required to assess the impact of the increased exposure, participation and organisation  
84 of the women's game (e.g., inception of the English Women's Super League [WSL] in 2017).  
85 Furthermore, the existing literature quantifying the anthropometric and physical characteristics of  
86 women's rugby league players have concentrated on small samples ( $n = 32$ , Gabbett [2007],  $n = 27$ ,  
87 Jones et al., [2016]) of international standard players. Previous literature in male rugby league has  
88 shown physiological characteristics to differentiate between playing standards (Gabbett & Seibold,  
89 2013; Till, Cobley, O'Hara, et al., 2011). A larger sample size comprising of international and non-  
90 international women's rugby league players is required to develop a holistic quantification of  
91 anthropometric and physical qualities and evaluate any differences which may exist between standards  
92 of competition (i.e., international vs non-international).

93

94 This study aims to address this evidence gap by quantifying the anthropometric (height, body mass,  
95 body composition) and physical (strength, power, speed, aerobic capacity) qualities of female rugby  
96 league players and identifying any differences that may exist between international and Women's Super  
97 League (WSL) players.

## 98 **Materials and Methods**

### 99 *Participants*

100 A total of 207 women's rugby league players from all 10 WSL clubs in England (100 forwards [age  
101  $23.2 \pm 5.8$ ]; 82 backs [age  $21.5 \pm 4.8$ ]) and the England national side (12 forwards [age  $23.7 \pm 4.0$ ]; 13  
102 backs [age  $23.8 \pm 4.8$ ]) were tested during the 2019 pre-season period. Due to factors such as equipment  
103 failure and adverse weather conditions, not every participant recorded a score for each test. Table 1  
104 displays the number of participants who recorded a score for each test for each combination of playing  
105 position and standard. Written consent was provided by all of the WSL clubs as well as the national  
106 side. All testing procedures were clearly explained prior to testing. Ethics for the experimental  
107 procedures were granted prior to data collection.

108 **Table 1. The number of participants who completed each test for each combination of playing standard and position**

|                        | Height | Body Mass | Body Fat % | CMJ | IMTP | 10m | 20m | 30m | 40m | Modified Yo-Yo IRT1 |
|------------------------|--------|-----------|------------|-----|------|-----|-----|-----|-----|---------------------|
| WSL Forwards           | 94     | 94        | 87         | 92  | 91   | 95  | 95  | 95  | 75  | 94                  |
| WSL Backs              | 78     | 79        | 71         | 74  | 74   | 80  | 80  | 80  | 66  | 78                  |
| International Forwards | 12     | 12        | 12         | 12  | 12   | 11  | 11  | 11  | 11  | 11                  |
| International Backs    | 13     | 13        | 13         | 13  | 13   | 13  | 13  | 13  | 13  | 12                  |

## 110 ***Design of Study***

111 The testing battery was designed to quantify standing height, body mass, body composition  
112 (bioelectrical impedance analysis), lower body muscular power via jump height (countermovement  
113 jump [CMJ]), muscular strength (isometric mid-thigh pull [IMTP]), speed (10, 20, 30, 40m sprint) and  
114 aerobic capacity (modified Yo-Yo intermittent recovery fitness test level 1 [modified Yo-Yo IRT1]).  
115 Standing height, body mass, body composition, muscular power and strength tests were completed  
116 indoors before moving outdoors to complete speed and aerobic capacity tests. Outdoor tests were  
117 completed on either a grass or artificial surface. The constraints of the testing battery were to ensure  
118 that all players within a squad ( $n = \sim 20$ ) could be tested within a single session (typically 1 hour). All  
119 testing was completed by the research team, visiting each club to ensure standardisation during the pre-  
120 season period. Prior to testing, participants were asked to provide information regarding their date of  
121 birth and typical playing position and performed a standardised warm up. Participants completed  
122 anthropometric, CMJ, muscular strength and speed testing prior to the modified Yo-Yo IRT1. Two  
123 trials were conducted for muscular power, muscular strength and speed testing, with the participants'  
124 best score recorded.

125

## 126 ***Procedures***

### 127 ***Anthropometrics and body composition***

128 Standing height was measured to the nearest 0.1cm using a portable stadiometer (Seca 213, Hamburg,  
129 Germany). Body mass was collected using calibrated analogue scales (Seca, Hamburg, Germany) to the  
130 nearest 0.1 kg. Bioelectrical impedance analysis (Tanita BF-350, Tokyo, Japan) was used to quantify  
131 body fat percentage. Previous research has demonstrated bioelectrical impedance analysis to have  
132 excellent reliability with a test re-test interclass correlation coefficient (ICC) of 0.98 [12].

### 133 ***Muscular Strength***

134 To assess muscular strength, the IMTP was performed using a dynamometer (T.K.K.5402, Takei  
135 Scientific Instruments Co. Ltd, Niigata, Japan) sampling at 122 Hz, which was attached to a wooden  
136 platform, a chain and a latissimus pulldown bar. The test protocol outlined by Till et al., (2018) was  
137 utilised in which participants were positioned by standing with their feet approximately shoulder width  
138 apart with the chain length adjusted so that the bar was positioned at the mid-thigh. Participants were  
139 instructed to maintain a flat back position with their head up and arms straight. Subjects gripped the  
140 bar, maintaining tension in the chain prior to beginning the pull, to ensure a jerk action was not  
141 performed. Participants pulled directly upwards, keeping their feet flat on the floor and without leaning  
142 back. The highest dynamometer score of the two attempts was recorded in kilograms. Despite a slight  
143 underestimation, a strong significant relationship has been demonstrated between the peak force derived  
144 from a dynamometer and that of a force platform ( $r= 0.92$ ,  $P<0.001$ ) [14] subsequently indicating  
145 appropriate construct validity in a cohort of senior and youth professional rugby league players.  
146 Furthermore, the dynamometer has been shown to have acceptable between day reliability (TE as CV=  
147 5.5% [4.5-6.9]) [15].

148

### 149 ***Lower Body Muscular Power***

150 Lower body muscular power was assessed via jump height using a CMJ. The CMJ was performed on  
151 two portable force plates (PS-2141, Pasco, Roseville, California, USA). Participants began with their  
152 legs fully extended with their hands on their hips. The depth of the countermovement was self-selected  
153 with no attempt made to control the depth or speed of the countermovement. Participants were  
154 instructed to keep their legs extended in flight and to land with their legs straight. Previous research has  
155 found portable force plates to be reliable when quantifying CMJ height with an ICC and coefficient of  
156 variation (CV) for CMJ height of 0.85 and 3.8% respectively [16].



157 ***Speed***

158 Speed was evaluated over 10, 20, 30 and 40m using photocell timing gates (Brower Timing Systems,  
159 Salt Lake City, UT). Participants started in their own time, 0.5m (marked with a cone) behind the first  
160 gate in a 2-point stance. Two maximal efforts were performed with a 3-minute rest separating each trial.  
161 Previous research has found Brower timing systems to be reliable when quantifying 10, 20, 30 and 40m  
162 sprints with mean typical errors expressed as a coefficient of variation of 2.5%, 2.2%, 2.2% and 1.8%  
163 respectively [15]. Furthermore, the validity of Brower timing systems to assess maximum velocity has  
164 been established in comparison to the criterion measure of a radar gun with a small typical error of  
165 estimate (1.67% [1.46-1.97]) and nearly perfect correlation ( $r= 0.97$  [0.95-0.98]) [17].

166

167 ***Aerobic Capacity***

168 A modified version on the prone Yo-Yo IRT1 was utilised to quantify aerobic capacity. The modified  
169 Yo-Yo IRT1 required participants to complete 2 x 15m shuttle runs, interspersed with 10 seconds of  
170 active recovery in which participants were required to walk to and from a cone placed 5m behind the  
171 start line. Participants started each stage of the test in prone position with their chest flat to the floor,  
172 legs straight and head behind the start line. The speed of the shuttles increased as the test progressed  
173 and is controlled by audio signals dictating the time in which shuttles need to be completed within. The  
174 speed of the test increased progressively with the players stopping of their own volition or until they  
175 had failed to meet the start/finish line in the allocated time, two times. The concurrent validity of the  
176 20m prone Yo-Yo IRT1 has been previously established in male academy rugby league players [18]  
177 however the present study reduced the shuttle distance to 15m to account for the physiological  
178 differences between male and female athletes.

179

180 ***Statistical Analysis***

181 To evaluate the differences between anthropometric and physical qualities, linear mixed models were  
182 used. Each anthropometric (height, body mass, body composition) and physical (strength, power, speed,  
183 aerobic capacity) quality was added to its own model as the dependent variable. A fully factorial model  
184 was produced, whereby position, playing standard and the position\*playing standard interaction were  
185 included as fixed effects. Club was included as a random effect to account for any clustering in  
186 anthropometric and physical qualities that could occur due to coach selection priorities or training  
187 schedules. Pairwise differences were used to evaluate the differences in the least square means between  
188 position, playing standard and the position\*playing standard interaction. Statistical significance was set  
189 at  $P < 0.05$ . Cohen's *d* effect sizes were used to establish the magnitude of difference, thresholds were  
190 set as: 0.2 *small*, 0.6 *moderate*, 1.2 *large*, 2.0 *very large*. Data were analysed using SAS University  
191 Edition (SAS Institute, Cary, NC).

192

193 ***Results***

194 The height, body mass and body fat % for all WSL forwards and backs and international forwards and  
195 backs are presented in Figure 1. The CMJ, IMTP and modified Yo-Yo IRT1 values are presented in  
196 Figure 2, with 10, 20, 30 and 40m sprint times for WSL and international forwards and backs presented  
197 in Figure 3. The mean  $\pm$  standard deviation for all anthropometric and physical qualities for international  
198 and WSL forwards and backs are presented in table two. Table three displays the effect sizes, 95%  
199 confidence intervals and P values for differences between international and WSL forwards and backs.

200 Figure 1: The height, body mass and body fat % for WSL forwards and backs and international forwards and backs

201 Figure 2: The CMJ, IMTP and modified Yo-Yo IRT1 scores for WSL forwards and backs and international forwards and backs

202 Figure 3: The 10, 20, 30, and 40m times for WSL forwards and backs and international forwards and backs

203

204 **Table 2. Anthropometric and physical qualities (mean  $\pm$  SD) for WSL forwards and backs and international forwards and backs**

|                           | Height<br>(cm)  | Body Mass<br>(kg) | Body Fat<br>(%) | CMJ<br>(cm)    | IMTP<br>(kg)     | 10m<br>(s)      | 20m<br>(s)      | 30m<br>(s)      | 40m<br>(s)      | Modified<br>Yo-Yo IRT1<br>(m) |
|---------------------------|-----------------|-------------------|-----------------|----------------|------------------|-----------------|-----------------|-----------------|-----------------|-------------------------------|
| Forwards                  | 155.3 $\pm$ 6.6 | 82.5 $\pm$ 14.8   | 37.7 $\pm$ 6.9  | 23.5 $\pm$ 4.4 | 111.6 $\pm$ 21.9 | 2.12 $\pm$ 0.14 | 3.72 $\pm$ 0.27 | 5.29 $\pm$ 0.41 | 6.91 $\pm$ 0.61 | 453.4 $\pm$ 258.8             |
| Backs                     | 164.4 $\pm$ 4.3 | 67.7 $\pm$ 9.2    | 30.4 $\pm$ 6.3  | 27.6 $\pm$ 4.9 | 106.0 $\pm$ 20.6 | 1.98 $\pm$ 0.11 | 3.46 $\pm$ 0.20 | 4.90 $\pm$ 0.33 | 6.33 $\pm$ 0.46 | 665.0 $\pm$ 298.2             |
| WSL                       | 164.5 $\pm$ 5.6 | 76.0 $\pm$ 15.0   | 34.5 $\pm$ 7.9  | 24.8 $\pm$ 4.9 | 109.3 $\pm$ 22.1 | 2.07 $\pm$ 0.14 | 3.63 $\pm$ 0.26 | 5.16 $\pm$ 0.41 | 6.71 $\pm$ 0.61 | 522.7 $\pm$ 284.8             |
| International             | 167.7 $\pm$ 5.2 | 73.0 $\pm$ 9.6    | 33.8 $\pm$ 5.4  | 29.1 $\pm$ 4.7 | 107.5 $\pm$ 17.3 | 1.93 $\pm$ 0.11 | 3.36 $\pm$ 0.17 | 4.73 $\pm$ 0.25 | 6.17 $\pm$ 0.34 | 763.0 $\pm$ 301.9             |
| WSL<br>Forwards           | 165.1 $\pm$ 6.6 | 83.3 $\pm$ 15.0   | 38.0 $\pm$ 7.0  | 23.0 $\pm$ 4.3 | 112.4 $\pm$ 21.9 | 2.13 $\pm$ 0.14 | 3.75 $\pm$ 0.26 | 5.34 $\pm$ 0.40 | 6.99 $\pm$ 0.60 | 460.6 $\pm$ 241.9             |
| WSL<br>Backs              | 163.7 $\pm$ 4.1 | 67.4 $\pm$ 9.6    | 30.2 $\pm$ 6.6  | 27.0 $\pm$ 4.8 | 105.5 $\pm$ 21.8 | 1.99 $\pm$ 0.10 | 3.49 $\pm$ 0.19 | 4.95 $\pm$ 0.32 | 6.41 $\pm$ 0.44 | 694.9 $\pm$ 276.0             |
| International<br>Forwards | 166.7 $\pm$ 6.6 | 76.3 $\pm$ 11.6   | 35.9 $\pm$ 6.1  | 27.1 $\pm$ 4.0 | 105.8 $\pm$ 22.1 | 1.99 $\pm$ 0.09 | 3.45 $\pm$ 0.17 | 4.86 $\pm$ 0.25 | 6.35 $\pm$ 0.35 | 709.1 $\pm$ 292.2             |
| International<br>Backs    | 168.7 $\pm$ 3.3 | 70.0 $\pm$ 6.4    | 31.8 $\pm$ 4.0  | 30.9 $\pm$ 4.6 | 109.0 $\pm$ 12.2 | 1.88 $\pm$ 0.10 | 3.28 $\pm$ 0.13 | 4.61 $\pm$ 0.19 | 6.01 $\pm$ 0.26 | 812.5 $\pm$ 314.8             |

205 **Table 3. The differences (effect size, 95% CI and P value) between WSL forwards and backs and international (int) forwards and backs for**  
 206 **anthropometric and physical quality measures**

|                                                | Height                                | Body Mass                            | Body Composition                     | CMJ                                   | IMTP                                 | 10m                                 | 20m                                 | 30m                                 | 40m                                 | Modified Yo-Yo IRT1                    |
|------------------------------------------------|---------------------------------------|--------------------------------------|--------------------------------------|---------------------------------------|--------------------------------------|-------------------------------------|-------------------------------------|-------------------------------------|-------------------------------------|----------------------------------------|
| Forwards vs. Backs                             | -0.03<br>(-0.46 to 0.40)<br>p = 0.88  | 0.91*<br>(0.48 to 1.34)<br>p = 0.00  | 0.92*<br>(0.50 to 1.34)<br>p = 0.00  | 0.94*<br>(1.37 to 0.51)<br>p = 0.00   | 0.12<br>(-0.31 to 0.54)<br>p = 0.59  | 0.98*<br>(0.59 to 1.37)<br>p = 0.00 | 0.96*<br>(0.58 to 1.34)<br>p = 0.00 | 0.88*<br>(0.51 to 1.26)<br>p = 0.00 | 0.89*<br>(0.53 to 1.26)<br>p = 0.00 | -0.58*<br>(-0.98 to -0.18)<br>p = 0.01 |
| International vs. WSL                          | -0.57*<br>(-1.00 to 0.14)<br>p = 0.01 | 0.20<br>(-0.26 to 0.67)<br>p = 0.38  | 0.11<br>(-0.37 to 0.60)<br>p = 0.64  | 0.96*<br>(1.43 to 0.48)<br>p = 0.00   | 0.10<br>(-0.38 to 0.57)<br>p = 0.68  | 0.92*<br>(0.46 to 1.38)<br>p = 0.00 | 0.90*<br>(0.35 to 1.25)<br>p = 0.00 | 0.83*<br>(0.39 to 1.27)<br>p = 0.00 | 0.61*<br>(0.16 to 1.07)<br>p = 0.01 | -0.51*<br>(-0.99 to -0.03)<br>p = 0.04 |
| International Forwards vs. WSL Forwards        | -0.28<br>(-0.88 to 0.33)<br>p = 0.37  | 0.57<br>(-0.07 to 1.21)<br>p = 0.10  | 0.40<br>(-0.25 to 1.05)<br>p = 0.23  | 0.92*<br>(1.58 to 0.27)<br>p = 0.01   | 0.31<br>(-0.34 to 0.96)<br>p = 0.34  | 1.13*<br>(0.49 to 1.76)<br>p = 0.00 | 1.02*<br>(0.40 to 1.63)<br>p = 0.00 | 1.05*<br>(0.44 to 1.66)<br>p = 0.00 | 0.89*<br>(0.27 to 1.50)<br>p = 0.01 | -0.71*<br>(-0.99 to -0.03)<br>p = 0.03 |
| WSL Forwards vs. WSL Backs                     | 0.26<br>(-0.05 to 0.56)<br>p = 0.10   | 1.28*<br>(0.98 to 1.58)<br>p = 0.00  | 1.20*<br>(0.90 to 1.51)<br>p = 0.00  | 0.91*<br>(1.21 to -0*.60)<br>p = 0.00 | 0.33*<br>(0.03 to 0.63)<br>p = 0.03  | 1.18*<br>(0.92 to 1.45)<br>p = 0.00 | 1.18*<br>(0.92 to 1.43)<br>p = 0.00 | 1.11*<br>(0.85 to 1.36)<br>p = 0.00 | 1.17*<br>(0.90 to 1.44)<br>p = 0.00 | -0.77*<br>(1.04 to -0.51)<br>p = 0.00  |
| International Backs vs. WSL Forwards           | -0.60<br>(-1.20 to 0.01)<br>p = 0.05  | 1.12*<br>(0.50 to 1.74)<br>p = 0.00  | 1.03*<br>(0.40 to 1.67)<br>p = 0.00  | 1.90*<br>(2.52 to 1.28)<br>p = 0.00   | 0.21<br>(-0.40 to 0.83)<br>p = 0.50  | 1.90*<br>(1.33 to 2.47)<br>p = 0.00 | 1.76*<br>(1.20 to 2.32)<br>p = 0.00 | 1.71*<br>(1.16 to 2.26)<br>p = 0.00 | 1.51*<br>(0.95 to 2.06)<br>p = 0.00 | -1.09*<br>(-1.69 to -0.48)<br>p = 0.00 |
| International Forwards vs. WSL Backs           | 0.53<br>(-0.08 to 1.15)<br>p = 0.09   | 0.71*<br>(0.06 to 1.35)<br>p = 0.03  | 0.81*<br>(0.15 to 1.46)<br>p = 0.02  | 0.02<br>(-0.64 to 0.68)<br>p = 0.96   | 0.02<br>(-0.63 to 0.67)<br>p = 0.96  | 0.06<br>(-0.57 to 0.69)<br>p = 0.85 | 0.16<br>(-0.45 to 0.77)<br>p = 0.61 | 0.05<br>(-0.56 to 0.66)<br>p = 0.90 | 0.28<br>(-0.33 to 0.89)<br>p = 0.40 | -0.07<br>(-0.70 to 0.57)<br>p = 0.84   |
| International Forwards vs. International Backs | -0.32<br>(-1.13 to 0.48)<br>p = 0.43  | 0.55<br>(-0.26 to 1.36)<br>p = 0.18  | 0.64<br>(-0.16 to 1.43)<br>p = 0.11  | 0.98*<br>(1.78 to 0.17)<br>p = 0.02   | -0.10<br>(-0.89 to 0.69)<br>p = 0.81 | 0.78*<br>(0.05 to 1.51)<br>p = 0.04 | 0.74*<br>(0.03 to 1.45)<br>p = 0.04 | 0.66<br>(-0.05 to 1.36)<br>p = 0.07 | 0.62<br>(-0.06 to 1.30)<br>p = 0.10 | -0.38<br>(-1.13 to 0.37)<br>p = 0.32   |
| International Backs vs. WSL Backs              | -0.86*<br>(-1.47 to 0.24)<br>p = 0.01 | -0.16<br>(-0.79 to 0.46)<br>p = 0.61 | -0.17<br>(-0.81 to 0.47)<br>p = 0.60 | 0.99*<br>(1.62 to 0.36)<br>p = 0.00   | -0.12<br>(-0.74 to 0.51)<br>p = 0.71 | 0.72*<br>(0.15 to 1.29)<br>p = 0.01 | 0.58*<br>(0.03 to 1.14)<br>p = 0.04 | 0.61*<br>(0.05 to 1.16)<br>p = 0.03 | 0.34<br>(-0.21 to 0.89)<br>p = 0.23 | -0.31<br>(-0.92 to 0.29)<br>p = 0.31   |

207 \*Denotes a statistically significant difference (p < 0.05)

208 ***Anthropometric characteristics***

209 There was a *moderate* and significant difference in height between international and WSL players with  
210 international players taller due to a *large* significant difference in height between international backs  
211 and WSL backs. A *large* and significant difference in body mass was found with forwards heavier than  
212 backs. *Large* and significant differences were present as WSL forwards had a greater body mass than  
213 WSL and international backs, with a *moderate* and significant difference between international  
214 forwards and WSL backs. Forwards had a *large* and significantly higher body fat % than backs with  
215 *large* and significant differences between WSL forwards and WSL and international backs and a  
216 *moderate* significant difference between international forwards and WSL backs.

217

218 **Physical Qualities**

219 *Large* and significant differences were found in jump height with backs jumping higher than forwards  
220 and international players jumping higher than WSL players. There was a *large* and significant  
221 difference between forwards with international forwards jumping higher than WSL forwards.  
222 International backs had a greater jump height compared to WSL forwards, international forwards and  
223 WSL backs with all differences *large* and significant. WSL forwards had a *small* and significantly  
224 higher IMTP score than WSL backs.

225

226 *Moderate* and *large* significant differences in sprint times were found with backs quicker than forwards  
227 and international players quicker than WSL players over 10m, 20m, 30m, and 40m. There were  
228 *moderate*, *large* and significant differences as international backs had quicker sprint times than  
229 international forwards over 10 and 20m, WSL forwards over 10, 20, 30 and 40m and WSL backs over  
230 10, 20 and 30m. WSL backs had quicker sprint times than WSL forwards over 10, 20, 30 and 40m with  
231 all differences *large* and significant. The sprint times for international forwards were quicker than WSL  
232 forwards with *large* and significant differences over 10, 20, 30 and 40m.

233

234 *Moderate* and significant differences were found between backs and forwards and international and  
235 WSL players for the modified Yo-Yo IRT1 with backs completing more meters than forwards and

236 international players completing more meters than WSL players. There was a *large* and significant  
237 difference between international backs and WSL forwards with international backs completing more  
238 meters. International forwards and WSL backs completed more meters than WSL forwards with  
239 differences *moderate* and significant.

240

## 241 **Discussion**

242 This study aimed to quantify the anthropometric and physical qualities of female rugby league players  
243 using the largest sample size on this cohort to date, identifying differences between international and  
244 WSL players and playing positional groups. Findings of this study substantiate previous literature in  
245 female rugby league (Gabbett, 2007; Jones et al., 2016) with forwards found to be heavier than backs  
246 with a higher body fat %. On the other hand, backs had greater lower body power, speed over 10, 20,  
247 30 and 40m and aerobic capacity. International players were taller than WSL players with greater lower  
248 body power, speed over 10, 20, 30 and 40m and aerobic capacity. These findings demonstrate the  
249 discrepancy in anthropometric and physical qualities between playing positions and playing standard.

250

251 Whilst the findings of this study largely support existing evidence (Gabbett, 2007; Jones et al., 2016),  
252 differences can be seen when comparing within positions at the international level. Gabbett (2007),  
253 Jones et al., (2016) and the present study found the average 40m sprint time for backs to be 6.33s, 6.13s  
254 and 6.01s respectively. A similar trend is found over 20m and 30m with backs and forwards quicker in  
255 this study in comparison to previous literature (Gabbett, 2007; Jones et al., 2016). Additionally,  
256 international forwards and backs in this study had greater lower body power (measured via jump height)  
257 (forwards:  $27.1 \pm 4.0$ cm, backs:  $30.9 \pm 4.6$ cm) in comparison to international forwards and backs  
258 (forwards:  $24.0 \pm 0.1$ cm, backs:  $29.0 \pm 0.1$ cm) in the study by Jones et al., (2016). Improvements in  
259 speed and lower body power may be indicative of enhanced anthropometric and physical qualities due  
260 to an increase in the professionalism of women's rugby league alongside increased provision (e.g.,  
261 access to strength and conditioning coaches). However, it cannot be conclusively stated that  
262 anthropometric and physical qualities have improved since initial research was conducted as  
263 comparisons between other anthropometric (e.g., body fat %) and physical (maximal strength) qualities

264 are difficult to interpret accurately due to differences in the test and equipment used between studies.  
265 Future research should seek to keep the testing battery and testing equipment consistent to  
266 longitudinally assess changes in the anthropometric and physical qualities of women's rugby league  
267 players.

268

269 Improved anthropometric and physical qualities have previously been shown to positively influence  
270 playing standard (Gabbett et al., 2009; Till, Copley, O'hara, et al., 2011). Such findings are corroborated  
271 by the results of this study as international players were more powerful, faster and had greater aerobic  
272 capacity in comparison to their WSL counterparts. Greater anthropometric and physical qualities may  
273 contribute to international selection as the demands of rugby league require a range of well-developed  
274 anthropometric and physical characteristics [3]. However, once selected, international women's rugby  
275 league players have access to a greater level of provision (e.g., structured strength and conditioning  
276 training sessions) compared to non-selected players, which may increase the disparity in anthropometric  
277 and physical qualities.

278

279 Whilst previous literature has presented means and standard deviations for anthropometric and physical  
280 measures, the small sample sizes have prevented analysis of the variability within the dataset (Gabbett,  
281 2007; Jones et al., 2016). Figures 1, 2 and 3 present the coefficient of variation of anthropometric and  
282 physical qualities across each of the standard and position combinations. Alongside the coefficient of  
283 variation, the visualisation of WSL forwards and backs data points displays the large variability in each  
284 of the anthropometric and physical measures. Large variability is prominent for measures of strength,  
285 jump height, aerobic capacity, body mass and body fat %. Such variability may be symptomatic of the  
286 different levels of provision available across the 10 WSL clubs. Discrepancies in provision include  
287 access to higher quality facilities (e.g. gyms) and the participation in structured strength and  
288 conditioning programs [21]. To elevate anthropometric and physical standards, all WSL clubs and  
289 players should be provided access to education regarding appropriate strength and conditioning  
290 practices. Due to the financial restrictions currently present in women's rugby league, it is not feasible  
291 for all WSL clubs to employ qualified strength and conditioning practitioners to administer and deliver

292 strength and conditioning programs. Therefore, facilitating educational opportunities, such as strength  
293 and conditioning workshops, is a crucial first step in advancing the current knowledge base in women's  
294 rugby league.

295

296 To the authors knowledge, this study provides the largest quantification of anthropometric and physical  
297 qualities of women's international and Super League rugby league players. Despite this, the study is  
298 not without limitation. The 10, 20, 30 and 40m sprints alongside the modified Yo-Yo IRT1 had to be  
299 completed outside, on a grass or an artificial surface. Subsequently, variations in weather conditions  
300 may have influenced test scores. Whilst scores affected by adverse weather conditions have been  
301 removed from analysis, the possibility of weather conditions impacting test performance cannot be  
302 entirely ruled out. Future research should attempt to keep testing conditions consistent between clubs  
303 (e.g., surface type) or, when this is not possible, ensure all participants are wearing appropriate footwear.

304

### 305 **Conclusion**

306 The findings of this study update and substantiate previous literature quantifying the anthropometric  
307 and physical qualities of women's rugby league players whilst also comparing measures between  
308 playing standards. Backs and international players were found to have greater lower body power, speed  
309 and aerobic capacity in comparison to forwards and WSL players whilst forwards were found to be  
310 heavier with a higher body fat % in comparison to backs. Overall, this study provides position specific  
311 comparative data for the anthropometric and physical qualities of women's rugby league players.  
312 However, the variability in anthropometric and physical qualities for WSL players should be considered  
313 when evaluating mean values. Moving forward, focus should be placed on elevating anthropometric  
314 and physical qualities across the entirety of the WSL by increasing strength and conditioning provision  
315 and knowledge.

316

### 317 **Practical applications**

318 Due to the demanding nature of rugby league match-play, players are required to have well developed  
319 anthropometric and physical qualities [3]. The importance of anthropometric and physical qualities is



320 reinforced by their ability to enhance performance and reduce the risk of injury (Gabbett & Seibold,  
321 2013; Lloyd et al., 2016). Therefore, it is important to understand the current anthropometric and  
322 physical qualities of the highest standard of women's rugby league in England, the women's rugby  
323 league Super League and the international squad. This study provides the largest quantification of  
324 anthropometric and physical qualities of women's rugby league players to date, offering generalisable  
325 position specific comparative values. Practitioners may utilise these values to analyse the strengths and  
326 weaknesses of their players in comparison to WSL and international standard players. Such analysis  
327 may inform subsequent training programs to ensure players are prepared for the rigours of women's  
328 rugby league.

329

330 The large sample of WSL players analysed highlights the variability in anthropometric and physical  
331 qualities. The variability in anthropometric and physical qualities may be symptomatic of the varying  
332 levels of provision available to players. To elevate the anthropometric and physical standards across the  
333 WSL, players and clubs should be provided with access to education regarding appropriate strength and  
334 conditioning practises to increase the knowledge base and reduce discrepancies in anthropometric and  
335 physical qualities.

336

### 337 **References**

- 338 1. Cummins C, Melinz J, King D, Sanctuary C, Murphy A. Call to action: a collaborative  
339 framework to better support female rugby league players. *British journal of sports medicine*.  
340 2020. pp. 501–502. doi:10.1136/bjsports-2019-101403
- 341 2. Rugby Football League. *Women and Girls Rugby League: Player Pathway*. 2019.
- 342 3. Emmonds S, Weaving D, Dalton-Barron N, Rennie G, Hunwicks R, Tee J, et al. Locomotor  
343 characteristics of the women's inaugural super league competition and the rugby league world  
344 cup. *J Sports Sci*. 2020;38: 1–8. doi:10.1080/02640414.2020.1790815
- 345 4. Gabbett TJ, Ullah S, Finch CF. Identifying risk factors for contact injury in professional rugby  
346 league players - Application of a frailty model for recurrent injury. *J Sci Med Sport*. 2012;15:  
347 496–504. doi:10.1016/j.jsams.2012.03.017

- 348 5. Till K, Scantlebury S, Jones B. Anthropometric and Physical Qualities of Elite Male Youth  
349 Rugby League Players. *Sport Med.* 2017;47: 2171–2186. doi:10.1007/s40279-017-0745-8
- 350 6. Gabbett TJ. Physiological and anthropometric characteristics of elite women rugby league  
351 players. *J Strength Cond Res.* 2007;21: 875–881. doi:10.1519/R-20466.1
- 352 7. Jones B, Emmonds S, Hind K, Nicholson G, Rutherford Z, Till K. Physical qualities of  
353 international female rugby league players by playing position. *J Strength Cond Res.* 2016;30:  
354 1333–1340.
- 355 8. Lombard W, Durandt J, Masimla H, Green M, Lambert M. Changes in body size and physical  
356 characteristics of South African Under-20 Rugby Union players over a 13-year period. *J*  
357 *Strength Cond Res.* 2015;29: 980–988.
- 358 9. Haugen TA, Tønnessen E, Seiler S. Speed and countermovement-jump characteristics of elite  
359 female soccer players, 1995-2010. *Int J Sports Physiol Perform.* 2012;7: 340–349.  
360 doi:10.1123/ijsp.7.4.340
- 361 10. Gabbett TJ, Seibold AJ. Relationship between tests of physical qualities, team selection, and  
362 physical match performance in semiprofessional rugby league players. *J Strength Cond Res.*  
363 2013;27: 3259–3265.
- 364 11. Till K, Copley S, O’Hara J, Brightmore A, Cooke C, Chapman C. Using anthropometric and  
365 performance characteristics to predict selection in junior UK Rugby League players. *J Sci Med*  
366 *Sport.* 2011;14: 264–269. doi:10.1016/j.jsams.2011.01.006
- 367 12. Loenneke JP, Barnes JT, Wilson JM, Lowery RP, Isaacs MN, Pujol TJ. Reliability of field  
368 methods for estimating body fat. *Clin Physiol Funct Imaging.* 2013;33: 405–408.  
369 doi:10.1111/cpf.12045
- 370 13. Till K, Morris R, Stokes K, Trewartha G, Twist C, Dobbin N, et al. Validity of an isometric  
371 midthigh pull dynamometer in male youth athletes. *J Strength Cond Res.* 2018;32: 490–493.
- 372 14. Dobbin N, Hunwicks R, Jones B, Till K, Highton J, Twist C. Criterion and construct validity  
373 of an isometric mid- thigh pull dynamometer for assessing whole body strength in professional  
374 rugby league players Short Title : Validity of an isometric mid-thigh pull dynamometer  
375 Department of Sport and Exercise. *Int J Sports Physiol Perform.* 2018;13: 235–239.

- 376 15. Sawczuk T, Jones B, Scantlebury S, Weakley J, Read D, Costello N, et al. Between-Day  
377 Reliability and Usefulness of a Fitness Testing Battery in Youth Sport Athletes: Reference  
378 Data for Practitioners. *Meas Phys Educ Exerc Sci*. 2018;22: 11–18.  
379 doi:10.1080/1091367X.2017.1360304
- 380 16. Owen C, Till K, Jones B, Weakley J. Testing methods and physical qualities of male age grade  
381 rugby union players: A systematic review. *PLoS ONE*. 2020.  
382 doi:10.1371/journal.pone.0233796
- 383 17. Roe G, Darrall-Jones J, Black C, Shaw W, Till K, Jones B. Validity of 10-HZ GPS and timing  
384 gates for assessing maximum velocity in professional rugby union players. *Int J Sport Physiol*  
385 *Perform*. 2016;12: 836–839.
- 386 18. Dobbin N, Highton J, Moss S., Hunwicks R, Twist C. Concurrent validity of a rugby-specific  
387 Yo-Yo intermittent recovery test (level 1) for assessing match-related running performance. *J*  
388 *Strength Cond Res*. 2018.
- 389 19. Till K, Cogley S, O'hara J, Brightmore A, Cooke C, Chapman C. Using anthropometric and  
390 performance characteristics to predict selection in junior UK Rugby League players. *J Sci Med*  
391 *Sport*. 2011;14: 264–269.
- 392 20. Gabbett T, Kelly J, Ralph S, Driscoll D. Physiological and anthropometric characteristics of  
393 junior elite and sub-elite rugby league players, with special reference to starters and non-  
394 starters. *J Sci Med Sport*. 2009;12: 215–222. doi:10.1016/j.jsams.2007.06.008
- 395 21. McCormack S, Jones B, Scantlebury S, Rotheram D, Till K. “It’s Important, but It’s Not  
396 Everything”: Practitioners’ Use, Analysis and Perceptions of Fitness Testing in Academy  
397 Rugby League. *Sports*. 2020;8: 130. doi:10.3390/sports8090130
- 398 22. Lloyd R, Cronin J, Faigenbaum A, Haff G, Howard R, Kraemer W, et al. The national strength  
399 and conditioning association position statement on long-term athletic development. *J Strength*  
400 *Cond Res*. 2016;30: 1491–1509.

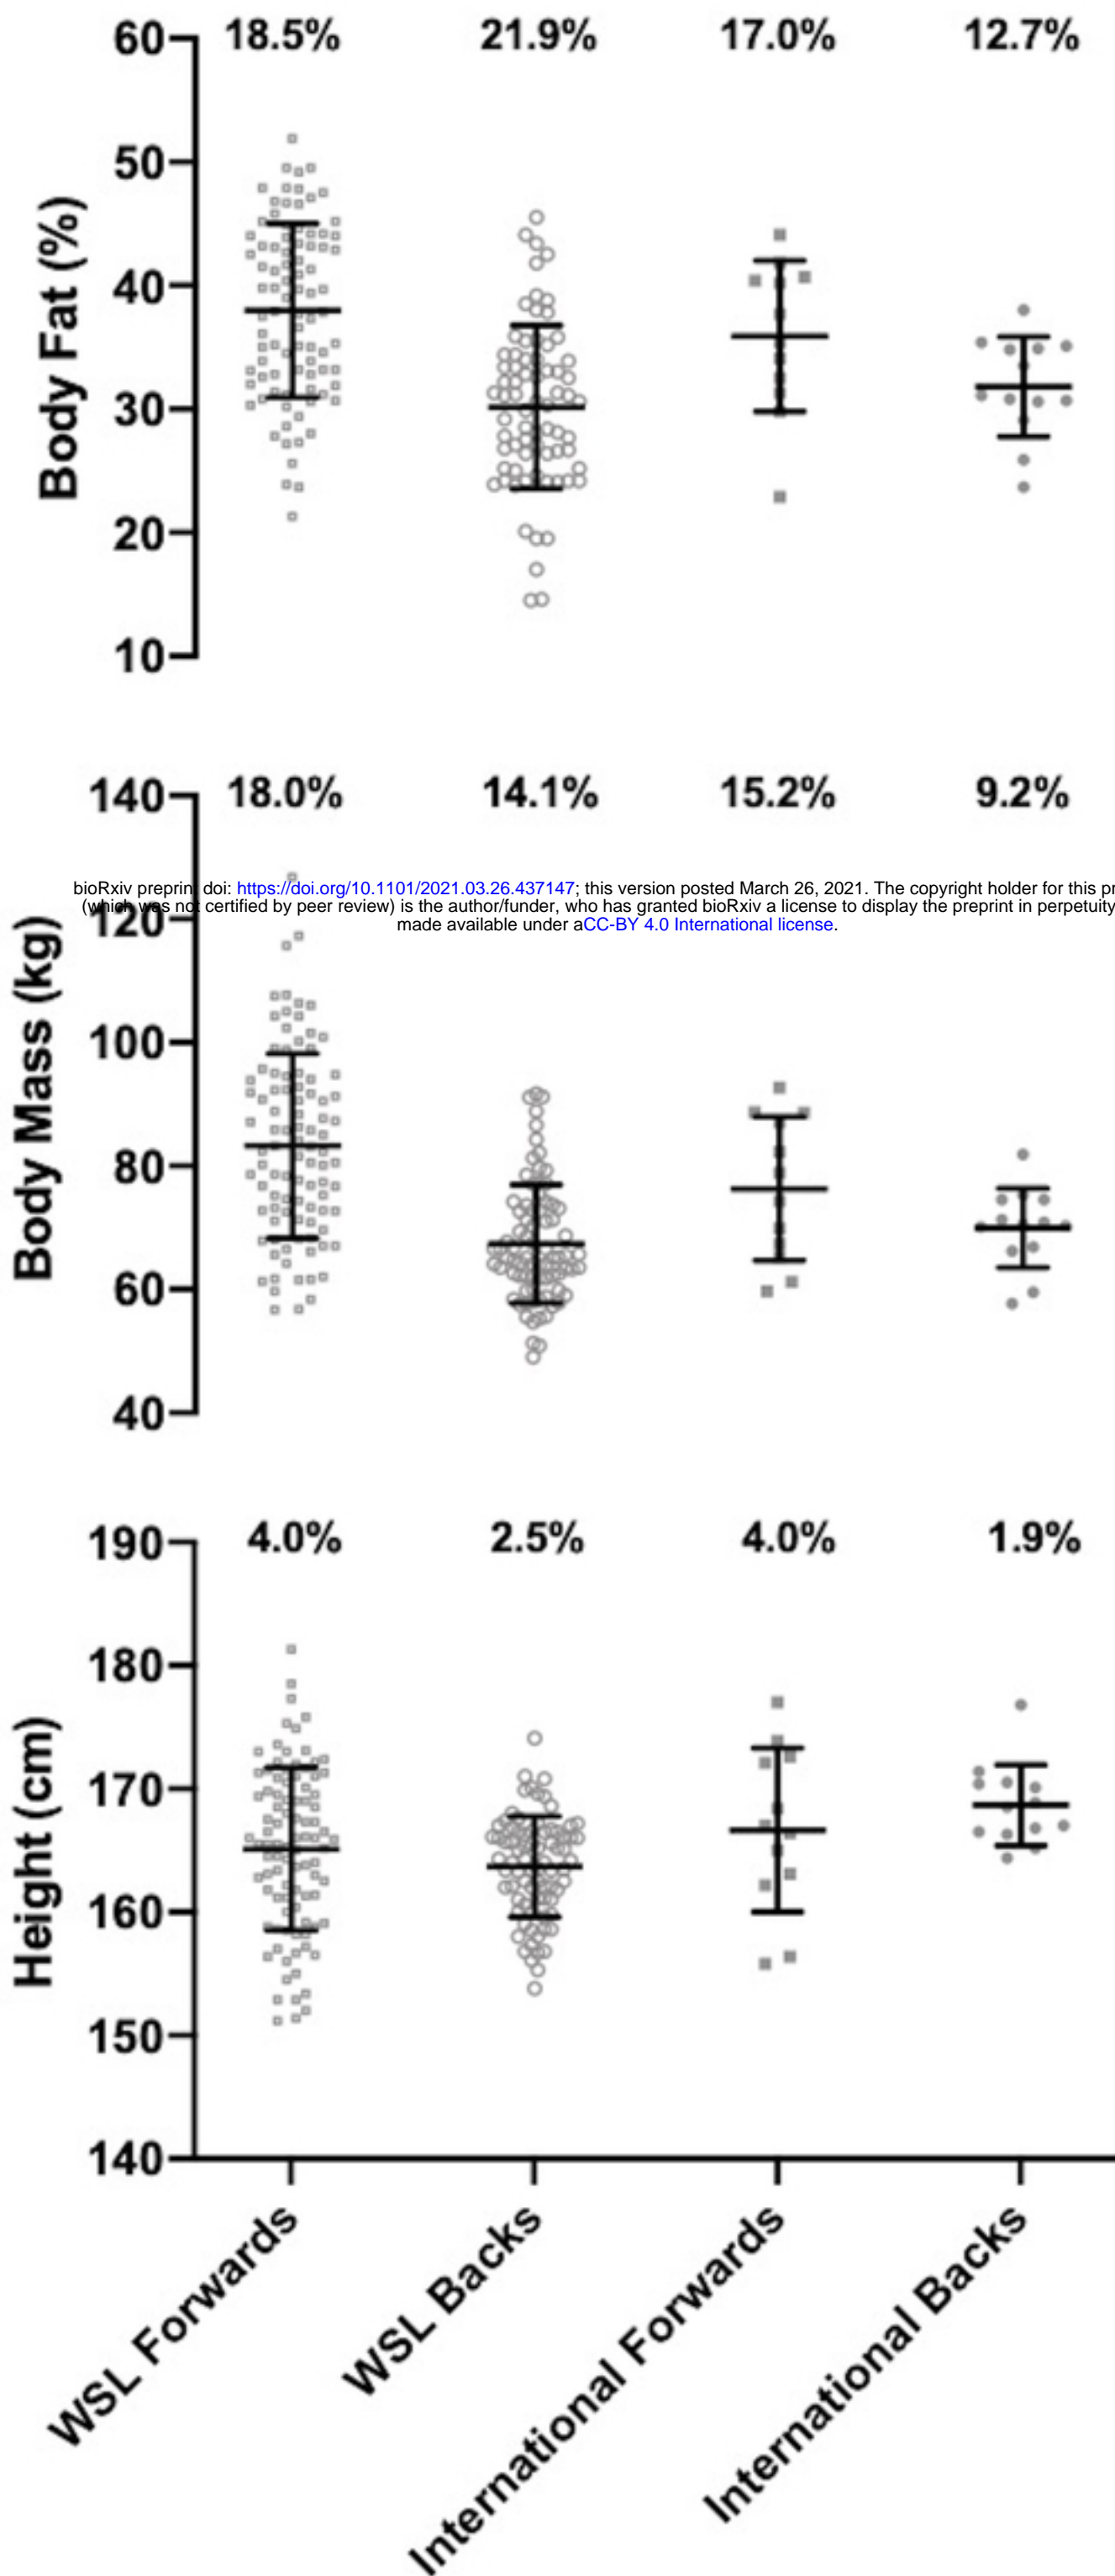

Figure 1

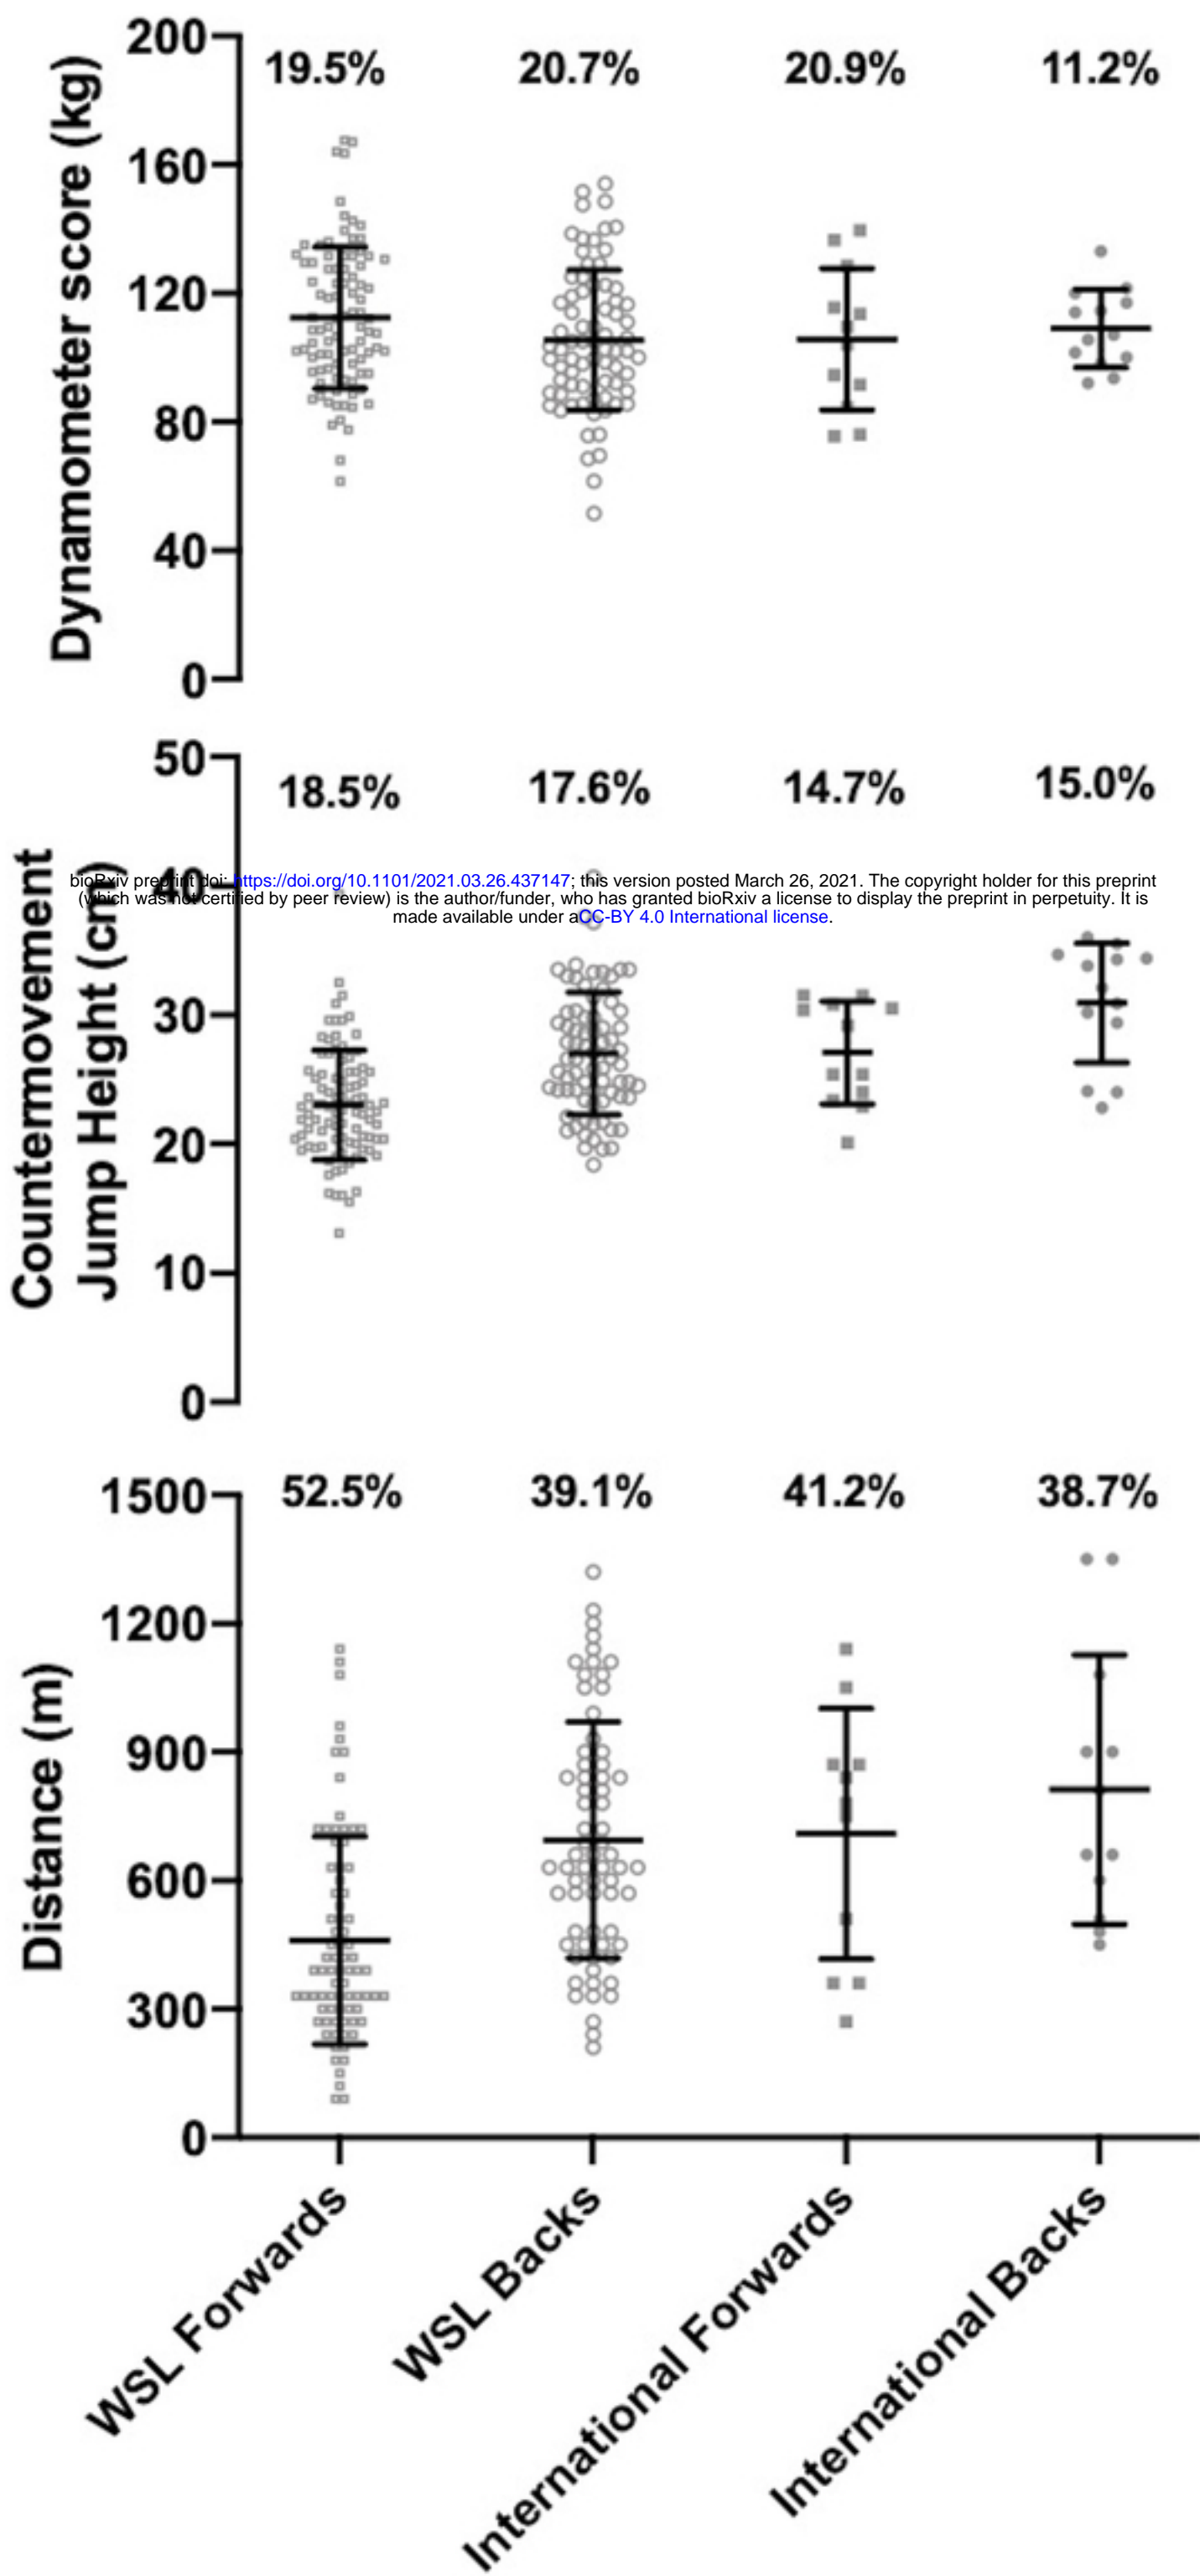

Figure 2

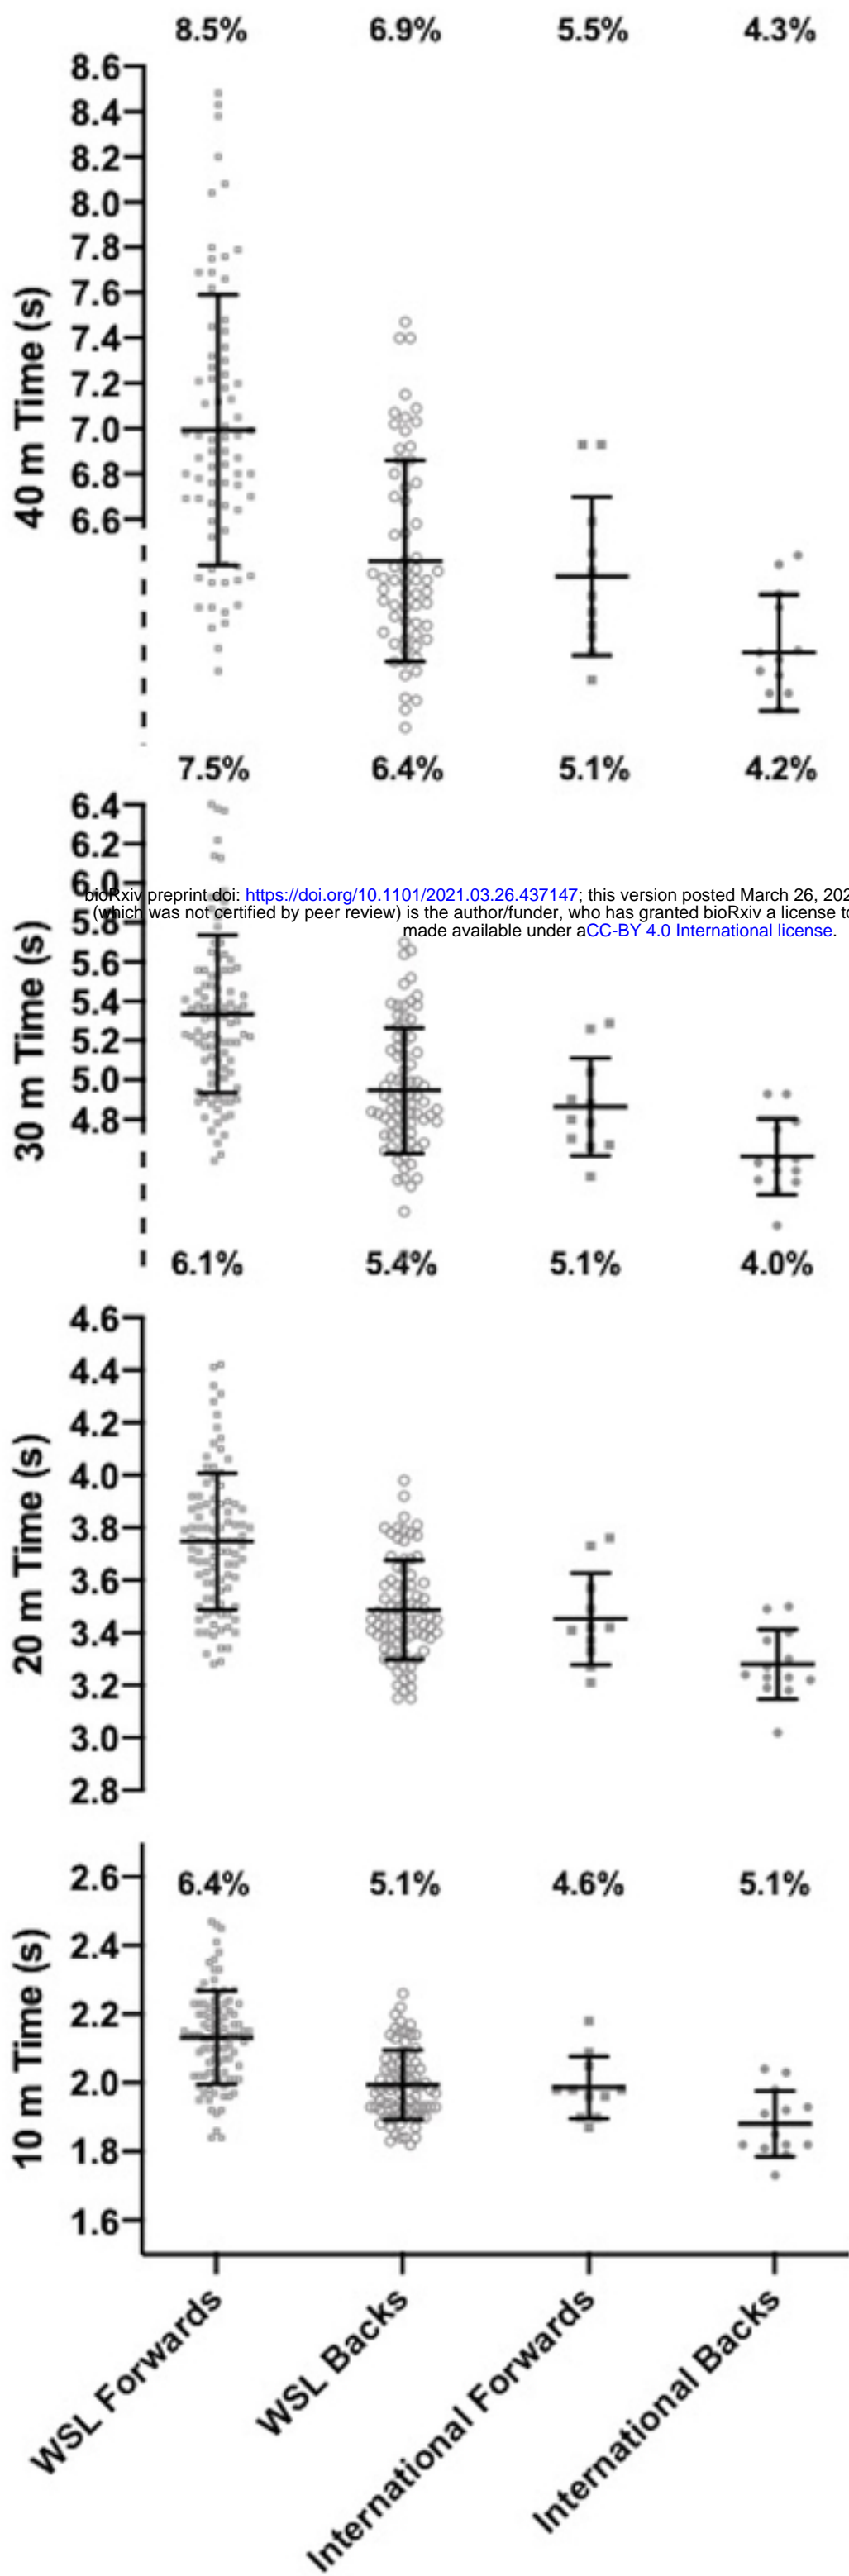

bioRxiv preprint doi: <https://doi.org/10.1101/2021.03.26.437147>; this version posted March 26, 2021. The copyright holder for this preprint (which was not certified by peer review) is the author/funder, who has granted bioRxiv a license to display the preprint in perpetuity. It is made available under aCC-BY 4.0 International license.

Figure 3
